# Supplementary material
Source: PubMed Central journal article supplement (PMC4015460)

**Supplementary Figure S1.** Representative micrographs of DCIS and invasive breast cancers displaying PTEN expression (A, left) or loss (A, right), INPP4B expression (B, left) or loss (B right), pAKT expression lack of expression (C, left) and pAKT expression in neoplastic cells (C, right), pS6 lack of expression (D, left) and pS6 expression in neoplastic cells (D, right). Please note that in A and B, the expression of PTEN and INPP4B in stromal cells and/or normal breast epithelium was employed as an internal positive control in cases lacking PTEN and INPP4B expression in neoplastic cells, respectively.

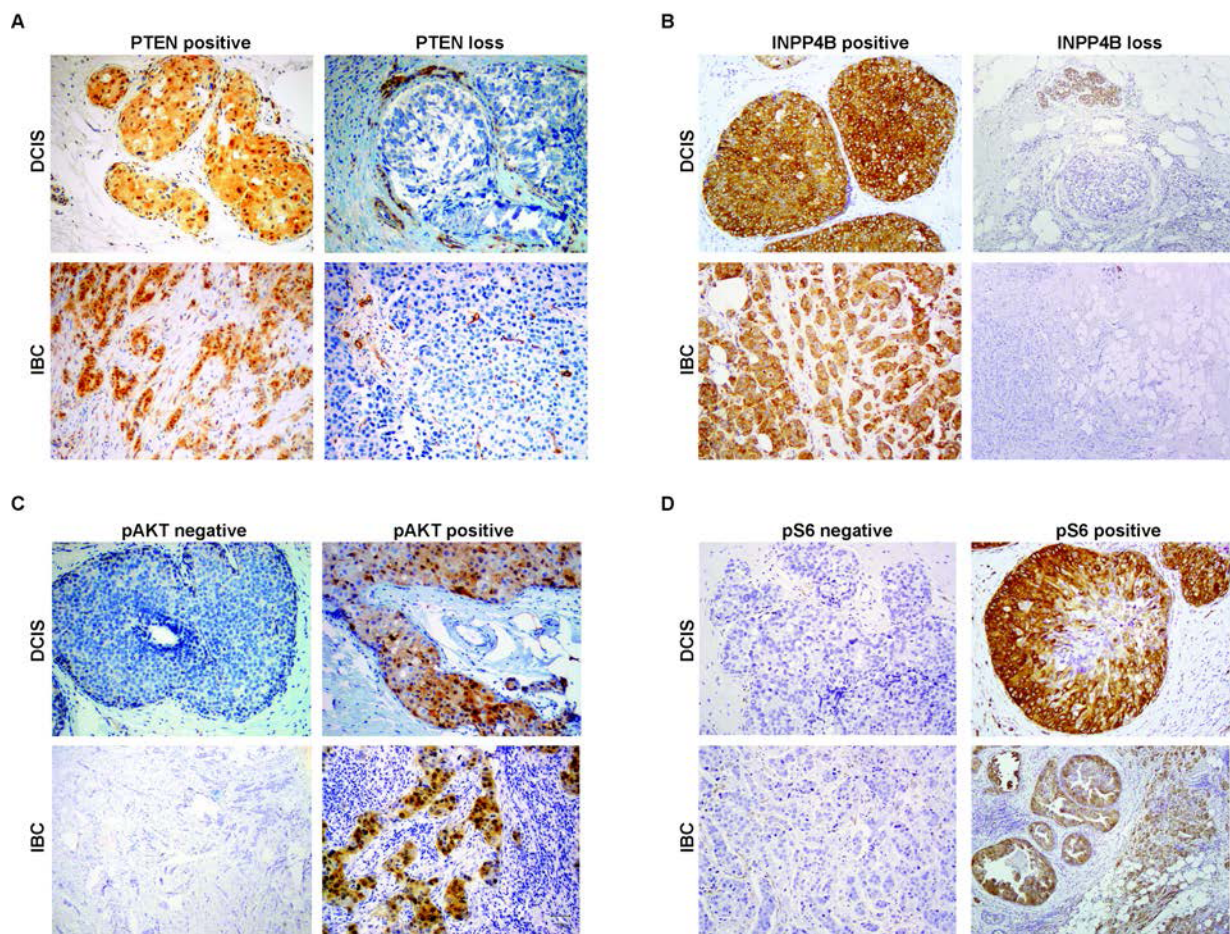

Supplement: NIHMS575226-supplement-1.pdf [file NIHMS575226-supplement-1.pdf]
