# Supplementary material
Source: PubMed Central journal article supplement (PMC4015460)
Supplement: NIHMS575226-supplement-2.pdf [file NIHMS575226-supplement-2.pdf]

**Supplementary Table 1.** Characteristics of patients with pure high-grade DCIS and high-grade DCIS associated with IBC included in this study.

|                      | <b>Pure high-grade DCIS</b> | <b>DCIS component (adjacent to IBC)</b> | <b>IBC component (adjacent to DCIS)</b> |
|----------------------|-----------------------------|-----------------------------------------|-----------------------------------------|
|                      | <b>n=89</b>                 | <b>n=119</b>                            | <b>n=119</b>                            |
| Age (mean, range)    | 53 yrs (35-84yrs)           | 51 yrs (28-84yrs)                       | 51 yrs (28-84yrs)                       |
| ≥ 50yrs              | 46 (52%)                    | 54 (46%)                                | 54 (46%)                                |
| < 50yrs              | 43 (48%)                    | 65 (54%)                                | 65 (54%)                                |
|                      |                             |                                         |                                         |
| Caucasian            | 62 (70%)                    | 85 (72%)                                | 85 (72%)                                |
| Hispanic             | 7 (8%)                      | 9 (7%)                                  | 9 (7%)                                  |
| African-American     | 7 (8%)                      | 12 (10%)                                | 12 (10%)                                |
| Asian                | 2 (2%)                      | 6 (5%)                                  | 6 (5%)                                  |
| Unknown              | 11 (12%)                    | 7 (6%)                                  | 7 (6%)                                  |
|                      |                             |                                         |                                         |
| Post-menopausal      | 47 (53%)                    | 54 (45%)                                | 54 (45%)                                |
|                      |                             |                                         |                                         |
| HRT use ≥ 1yr prior  | 12 (13%)                    | 15 (13%)                                | 15 (13%)                                |
|                      |                             |                                         |                                         |
| ER positivity*       | 46 (52%)                    | 75 (63%)                                | 75 (63%)                                |
|                      |                             |                                         |                                         |
| PR positivity*       | 41 (46%)                    | 62 (52%)                                | 62 (52%)                                |
|                      |                             |                                         |                                         |
| HER2 positivity*     | 51 (57%)                    | 73 (61%)                                | 73 (61%)                                |
|                      |                             |                                         |                                         |
| Nuclear grade 3      | 89 (100%)                   | 119 (100%)                              | 119 (100%)                              |
|                      |                             |                                         |                                         |
| Histological grade 2 | NA                          | NA                                      | 5 (4%)                                  |
| Histological grade 3 | NA                          | NA                                      | 114 (96%)                               |
|                      |                             |                                         |                                         |

\*All values reported for the DCIS component. DCIS, ductal carcinoma *in situ*; ER, estrogen receptor; HRT, hormone replacement therapy; IBC, invasive breast cancer; NA, not applicable; PR, progesterone receptor; yrs, years.
