# Supplementary material
Source: PubMed Central journal article supplement (PMC4015460)
Supplement: NIHMS575226-supplement-3.pdf [file NIHMS575226-supplement-3.pdf]

**Supplementary Table S2.** PI3K pathway alterations in pure high-grade DCIS, high-grade DCIS components adjacent to IBC, and in synchronous IBC components.

|                   | Pure DCIS   | DCIS adj IBC | p-value      | DCIS adj IBC | IBC          | p-value |
|-------------------|-------------|--------------|--------------|--------------|--------------|---------|
| PTEN loss         | 9/89 (10%)  | 14/119 (12%) | 0.824        | 14/119 (12%) | 14/119 (12%) | 1.000   |
| INPP4B loss       | 12/67 (18%) | 7/103 (7%)   | <b>0.044</b> | 7/103 (7%)   | 13/110 (12%) | 0.245   |
| <i>PIK3CA</i> mut | 4/89 (4%)   | 18/119 (15%) | <b>0.021</b> | 18/119 (15%) | 19/119 (16%) | 1.000   |
| <i>AKT1</i> mut   | 0/89 (0%)   | 1/119 (1%)   | 1.000        | 1/119 (1%)   | 1/119 (1%)   | 1.000   |
| pAKT pos          | 54/89 (61%) | 80/119 (67%) | 0.380        | 80/119 (67%) | 77/119 (65%) | 0.785   |
| pS6 pos           | 11/77 (14%) | 11/87 (13%)  | 0.821        | 11/87 (13%)  | 20/89 (22%)  | 0.113   |

Adj, adjacent to; DCIS, ductal carcinoma *in situ*; IBC, invasive breast cancer; mut, mutant.
