# Supplementary material
Source: PubMed Central journal article supplement (PMC4015460)
Supplement: NIHMS575226-supplement-4.pdf [file NIHMS575226-supplement-4.pdf]

**Supplementary Table S3.** *PIK3CA* mutations and mutation frequencies in pure high-grade DCIS and high-grade DCIS associated with IBC.

|    | Case ID | Component    | ER | PR | HER2 | <i>PIK3CA</i> mutation | Allele | WT frequency | Mutation frequency |
|----|---------|--------------|----|----|------|------------------------|--------|--------------|--------------------|
| 1  | D026    | Pure DCIS    | -  | -  | -    | H1047R                 | G      | 0.45         | 0.55               |
| 2  | D077    | Pure DCIS    | -  | -  | +    | H1047R                 | G      | 0.79         | 0.21               |
| 3  | D090    | Pure DCIS    | -  | -  | +    | H1047R                 | G      | 0.61         | 0.39               |
| 4  | D094    | Pure DCIS    | -  | -  | -    | H1047R                 | G      | 0.38         | 0.62               |
| 5  | I111    | DCIS adj IBC | +  | +  | -    | N345K                  | A      | 0.602        | 0.398              |
| 6  | I089    | DCIS adj IBC | +  | +  | -    | E542K                  | A      | 0.550        | 0.450              |
| 7  | I118    | DCIS adj IBC | +  | +  | -    | E542K                  | A      | 0.561        | 0.439              |
| 8  | I037    | DCIS adj IBC | +  | +  | +    | E545K                  | A      | 0.731        | 0.269              |
| 9  | I071    | DCIS adj IBC | -  | -  | +    | E545K                  | A      | 0.744        | 0.256              |
| 10 | I101    | DCIS adj IBC | +  | +  | -    | E545K                  | A      | 0.613        | 0.387              |
| 11 | I112    | DCIS adj IBC | +  | +  | -    | E545K                  | A      | 0.541        | 0.459              |
| 12 | I114    | DCIS adj IBC | +  | +  | -    | E545K                  | A      | 0.530        | 0.470              |
| 13 | I003    | DCIS adj IBC | +  | +  | +    | H1047R                 | G      | 0.563        | 0.437              |
| 14 | I014    | DCIS adj IBC | +  | -  | +    | H1047R                 | G      | 0.419        | 0.581              |
| 15 | I038    | DCIS adj IBC | +  | +  | +    | H1047R                 | G      | 0.750        | 0.250              |
| 16 | I041    | DCIS adj IBC | +  | +  | +    | H1047R                 | G      | 0.404        | 0.596              |
| 17 | I050    | DCIS adj IBC | -  | -  | +    | H1047R                 | G      | 0.667        | 0.333              |
| 18 | I068    | DCIS adj IBC | -  | -  | +    | H1047R                 | G      | 0.692        | 0.308              |
| 19 | I076    | DCIS adj IBC | -  | -  | +    | H1047R                 | G      | 0.675        | 0.325              |
| 20 | I106    | DCIS adj IBC | +  | +  | -    | H1047R                 | G      | 0.715        | 0.285              |
| 21 | I125    | DCIS adj IBC | +  | +  | -    | H1047R                 | G      | 0.735        | 0.265              |
| 22 | I129    | DCIS adj IBC | -  | -  | -    | H1047R                 | G      | 0.698        | 0.302              |

Adj, adjacent to; DCIS, ductal carcinoma *in situ*; ER, estrogen receptor; IBC, invasive breast cancer; WT, wild-type.
